# Supplementary material for: Perinatal risk factors in ex-preterm and/or low birthweight Colombian young adults: a retrospective cohort study on auditory and visual impairments
Source: PubMed Central journal article supplement — Lancet Reg Health Am. 2024 Nov 5;39:100921. doi: 10.1016/j.lana.2024.100921 (PMC11570731; doi:10.1016/j.lana.2024.100921), 2024-11-05
Supplement: mmc1.pdf [file mmc1.pdf]

**Supplementary Table 5.**  
**Main Differences during the first year of follow-up according to functional vision diagnosis at 20 years**

| <b>Variables</b>                                   | <b>Normal function</b> | <b>Visual</b> | <b>Functional vision impairment</b> | <b>P<sup>a</sup></b> | <b>Adjusted P<sup>b</sup></b> |
|----------------------------------------------------|------------------------|---------------|-------------------------------------|----------------------|-------------------------------|
| Chronological age at 41 weeks in days              | <b>N=454</b>           |               | <b>N=29</b>                         |                      |                               |
| P50(min-max)                                       | 49(0-98)               |               | 56(7-105)                           | 0.0033*              | 0.03*                         |
| Neuromotor evaluation at 3 months (INFANIB) N (%)  | Normal                 | 335/407(82.3) | 24/27(88.9)                         | 0.60                 |                               |
|                                                    | Transitory or abnormal | 72/407(17.7)  | 3/27(11.1)                          |                      |                               |
| Neuromotor evaluation at 6 months (INFANIB) N (%)  | Normal                 | 319/403(79.2) | 22/27(81.5)                         | 0.77                 |                               |
|                                                    | Transitory or abnormal | 84/403(20,8)  | 4/27(18.5)                          |                      |                               |
| Neuromotor evaluation at 9 months (INFANIB) N (%)  | Normal                 | 357/385(92.7) | 20/24(83.3)                         | 0.11                 |                               |
|                                                    | Transitory or abnormal | 28/385(7.3)   | 3/24(16.7)                          |                      |                               |
| Neuromotor evaluation at 12 months (INFANIB) N (%) | Normal                 | 401/402(96.8) | 28/29(96.6)                         | 1.00                 |                               |
|                                                    | Transitory             | 12/402(3.2)   | -                                   |                      |                               |
|                                                    | Abnormal               | 1/402(0.2)    | 1/29(3.5)                           |                      |                               |
|                                                    | Not evaluated          | 41/391(10.5)  | 3/28(10.7)                          | 0.0001*              | <0.01*                        |

|                                                        |                                      |               |             |         |       |
|--------------------------------------------------------|--------------------------------------|---------------|-------------|---------|-------|
| Evaluation by ophthalmology during the 12 months N (%) | Normal                               | 341/391(87.2) | 21/28(75.0) |         |       |
|                                                        | Regressive retinopathy               | 8/391(2.1)    | 2/28(7.1)   |         |       |
|                                                        | Non-regressive retinopathy           | 1/391(0.3)    | 2/28(7.1)   |         |       |
| Optometric evaluation During the 12 months n/N (%)     | Not evaluated                        | 42//354(11.9) | 3/28(10.7)  | 0.0030* | 0.03* |
|                                                        | Normal                               | 283/354(79.9) | 17/28(60.7) |         |       |
|                                                        | Refractive error with or without ROP | 22/354(6.2)   | 5/28(17.9)  |         |       |
| Risk of cerebral palsy at 12 months n/N (%)            | ROP                                  | 7/354(2.0)    | 3/28(10.7)  |         |       |
|                                                        |                                      | 5/403(1.2)    | 1/29(3.5)   | 0.34    |       |
|                                                        |                                      | 306/389(78.7) | 20/28(71.4) | 0.35    |       |
| Development coefficient at 6 months n/N (%)            | Normal or high                       | 59/389(15.2)  | 7/28(25.0)  |         |       |
|                                                        | Borderline bass                      | 24/389(6.2)   | 1/28(3.6)   |         |       |
|                                                        | Very low                             | 370/393(94.2) | 26/28(92.9) | 0.65    |       |
| Development coefficient at 12 months n/N (%)           | Normal or high                       | 13/393(3.3)   | 1/28(3.6)   |         |       |
|                                                        | Borderline bass                      | 10/393(2.5)   | 1/28(3.6)   |         |       |
|                                                        | Very low                             |               |             |         |       |

a. Chi2 or Fisher's exact test was used for qualitative variables and Mann Whitney or Student's t-test for quantitative variables, according to the distribution of each variable in the comparison groups.

b. Family-Wise Error Rate (FWER) correction for unadjusted significant values of  $p$ .  
Tables were based on retrospective data. There are different denominators according to data available during follow-up.  
P50, percentile 50 (median). INFANIB, infanib neuromotor test. ROP, Retinopathy of Prematurity.
