# Supplementary material for: Perinatal risk factors in ex-preterm and/or low birthweight Colombian young adults: a retrospective cohort study on auditory and visual impairments
Source: PubMed Central journal article supplement — Lancet Reg Health Am. 2024 Nov 5;39:100921. doi: 10.1016/j.lana.2024.100921 (PMC11570731; doi:10.1016/j.lana.2024.100921), 2024-11-05
Supplement: mmc2.pdf [file mmc2.pdf]

**Supplementary Table 4.**  
**Main Differences from birth up to discharge from the hospital according to visual functional diagnosis at 20 years.**

| <b>General characteristics of patients according to visual functional diagnosis</b> |                            |                                          |                      |                               |
|-------------------------------------------------------------------------------------|----------------------------|------------------------------------------|----------------------|-------------------------------|
| <b>Family sociodemographic characteristics</b>                                      | <b>Normal Vision N=454</b> | <b>Functional vision impairment N=29</b> | <b>P<sup>a</sup></b> | <b>Adjusted P<sup>b</sup></b> |
| Stable couple N/n(%)                                                                | 387/454(85.2)              | 21/29(72.4)                              | 0.06                 |                               |
| <b>Gestational characteristics</b>                                                  |                            |                                          |                      |                               |
| Cesarean Delivery N/n(%)                                                            | 290/453(64.0)              | 22/29(75.9)                              | 0.20                 |                               |
| <b>Perinatal and neonatal characteristics</b>                                       |                            |                                          |                      |                               |
| Birth weight <sup>c</sup> P50(min- max)                                             | 1,800(800-3,806)           | 1,600(800-2,000)                         | 0.0087*              | 0.06                          |
| Birth Length <sup>c</sup> P50(min- max)                                             | 42.0(28.0-53.0)            | 41.0(34.0-47.0)                          | 0.0188*              | 0.12                          |
| Birth Head Circumference <sup>c</sup> P50(min- max)                                 | 31.0(25.0-36.6)            | 30.0(23.5-33.0)                          | 0.06                 |                               |
| GA by Ballard Mean (SD)                                                             | 34.4(2.8)                  | 32.6(3.1)                                | 0.0009*              | <0.001*                       |
| Preterm (<37 weeks) N/n(%)                                                          | 352/454(77.5)              | 27/29(93.1)                              | 0.06                 |                               |
| Neonatal Adaptation N/n(%)                                                          | Spontanea                  | 15/21(71.4)                              | 0.08                 |                               |
|                                                                                     | Conducted                  | 4/21(19.1)                               |                      |                               |
|                                                                                     | Induced                    | 2/21(9.5)                                |                      |                               |
| Birth weight categories N/n (%)                                                     | <=1500g                    | 77/454(17.0)                             | 0.0040*              | 0.04*                         |
|                                                                                     | 1501 - <=1800g             | 163/454(35.9)                            |                      |                               |
|                                                                                     |                            | 7/29(24.1)                               |                      |                               |

|                                           |                                                                    |               |             |         |      |
|-------------------------------------------|--------------------------------------------------------------------|---------------|-------------|---------|------|
|                                           | >=1800g                                                            | 214/454(47.1) | 10/29(34.5) |         |      |
| GA categories<br>N/n(%)                   | <=32 weeks                                                         | 124/454(27.3) | 14/29(48.3) | 0.06    |      |
|                                           | >32 - <35 weeks                                                    | 121/454(26.7) | 7/29(34.1)  |         |      |
|                                           | >=35 - <37                                                         | 107/454(23.6) | 6/29(20.7)  |         |      |
|                                           | >=37                                                               | 102/454(22.5) | 2/29(6.9)   |         |      |
|                                           | Required hospitalization in the URN during neonatal period N/n (%) | 243/454(53.5) | 22/29(75.9) | 0.0190* | 0.16 |
| Total days of stay in NCU<br>P50(min-max) | 14(1-57)                                                           | 18.5(5-64)    | 0.05        |         |      |
| Hospitalized in NICU N/n (%)              | 58/454(12.8)                                                       | 7/29(24.1)    | 0.08        |         |      |
| Neonatal sepsis N/n(%)                    | 102/243(42.0)                                                      | 14/22(63.6)   | 0.05        |         |      |
| NEC N/n(%)                                | 22/243(9.1)                                                        | 4/22(18.2)    | 0.0160*     | 0.14    |      |
| Required phototherapy N/n(%)              | 154/454(33.9)                                                      | 18/29(62.1)   | 0.0020*     | 0.02*   |      |
| Days with PN P50(min-max)                 | 0(0-38)                                                            | 0(0-18)       | 0.0446*     | 0.34    |      |
| Total days with oxygen<br>P50(min-max)    | 5(0-43)                                                            | 9(0-46)       | 0.0219*     | 0.18*   |      |

a. Chi2 or Fisher's exact test was used for qualitative variables and Mann Whitney or Student's t-test for quantitative variables, according to the distribution of each variable in the comparison groups.

b. Family-Wise Error Rate (FWER) correction for unadjusted significant values of p.

c. Weight in grams, length and head circumference in cm.

Tables were based on retrospective data. There are different denominators according to data available during follow-up.

P50, percentile 50 (median). GA, SD, Standard Deviation. NICU, Neonatal Intensive Care Unit. NEC, Necrotizing Enterocolitis. PN, Parenteral Nutrition.
