# Supplementary material for: Perinatal risk factors in ex-preterm and/or low birthweight Colombian young adults: a retrospective cohort study on auditory and visual impairments
Source: PubMed Central journal article supplement — Lancet Reg Health Am. 2024 Nov 5;39:100921. doi: 10.1016/j.lana.2024.100921 (PMC11570731; doi:10.1016/j.lana.2024.100921), 2024-11-05
Supplement: mmc3.pdf [file mmc3.pdf]

**Supplementary Table 3.**

**Main Differences during the first year of follow-up according to auditory functional diagnosis at 20 years**

| <b>Variables</b>                 | <b>Normal audition<br/>N=451</b> | <b>Functional deafness<br/>uni or bilateral<br/>N=40</b> | <b>P<sup>a</sup></b> | <b>Adjusted P<sup>b</sup></b> |
|----------------------------------|----------------------------------|----------------------------------------------------------|----------------------|-------------------------------|
| <b>Follow-up Characteristics</b> |                                  |                                                          |                      |                               |
| 40 weeks                         | Weight <sup>c</sup> mean (SD)    | 2,830(1,220-4,310)                                       | 0.14                 |                               |
|                                  | Length <sup>c</sup> P50(min-max) | 47(37-56)                                                | 0.45                 |                               |
|                                  | HC <sup>c</sup> P50(min-max)     | 34.6(29.5-38.5)                                          | 0.23                 |                               |
| 3 months                         | Weight <sup>c</sup> P50(min-max) | 5,310(3,080-7,810)                                       | 0.05                 |                               |
|                                  | Length <sup>c</sup> P50(min-max) | 57(37.5-66.5)                                            | 0.10                 |                               |
|                                  | HC <sup>c</sup> P50(min-max)     | 39.5(35.0-44.3)                                          | 0.11                 |                               |
| 6 months                         | Weight <sup>c</sup> P50(min-max) | 6,640(4,020-9,920)                                       | 0.0225*              | 0.31                          |
|                                  | Length <sup>c</sup> P50(min-max) | 63.0(52.5-70.5)                                          | 0.24                 |                               |
|                                  | HC <sup>c</sup> P50(min-max)     | 42.0(39.0-54.1)                                          | 0.14                 |                               |
| 9 months                         | Weight <sup>c</sup> P50(min-max) | 7,540(4,820-11,230)                                      | 0.0242*              | 0.32                          |
|                                  | Length <sup>c</sup> P50(min-max) | 67.0(42.0-77.0)                                          | 0.90                 |                               |
|                                  | HC <sup>c</sup> mean (SD)        | 44.0(40.0-50.0)                                          | 0.29                 |                               |
| 12 months                        | Weight P50(min-max)              | 8,442(6,250-12,060)                                      | 0.0258*              | 0.34                          |

|                                                             |                        |                 |                 |      |  |
|-------------------------------------------------------------|------------------------|-----------------|-----------------|------|--|
|                                                             | Length P50(min-max)    | 72.0(62.0-85.0) | 71.0(64.0-79.0) | 0.10 |  |
|                                                             | HC P50(min-max)        | 45.0(40.4-50.5) | 45.0(40.5-48.0) | 0.10 |  |
| Neuromotor<br>evaluation at 3<br>months (INFANIB)<br>n/N(%) | Normal                 | 339/409(82.9)   | 26/33(78.8)     | 0.22 |  |
|                                                             | Transitory or abnormal | 70/409(17.1)    | 8/33(21.2)      |      |  |
| Neuromotor<br>evaluation at 6<br>months (INFANIB)<br>n/N(%) | Normal                 | 320/404(79.2)   | 25/34(73.5)     | 0.38 |  |
|                                                             | Transitory or abnormal | 83/404(20.8)    | 9/34(26.5)      |      |  |
| Neuromotor<br>Evaluation at 9<br>months (INFANIB)<br>n/N(%) | Normal                 | 357/386(92.5)   | 26/31(83.9)     | 0.08 |  |
|                                                             | Transitory or abnormal | 29/386(7.5)     | 5/31(16.1)      |      |  |

|                                                                    |                         |                |                  |          |        |
|--------------------------------------------------------------------|-------------------------|----------------|------------------|----------|--------|
| Neuromotor evaluation at 12 months (INFANIB) n/N(%)                | Normal                  | 393/406(96.8)  | 30/33(90.9)      | 0.06     |        |
|                                                                    | Transitory or abnormal  | 13/406(3.2)    | 3/33(9.1)        |          |        |
| 12-month audiometry evaluation n/N (%)                             | Normal                  | 356/364(97.8)  | 27/32(84.4)      | <0.0001* | <0.01  |
|                                                                    | Unilateral hearing loss | 8/364(2.2)     | 1/32(3.1)        |          |        |
|                                                                    | Bilateral hearing loss  | 0              | 4/32(12.5)       |          |        |
| Risk of cerebral palsy at 12 months N (%)                          |                         | 6/405(1.5)     | 2/35(5.7)        | 0.13     |        |
| Developmental quotient at 6 months - hearing/speaking P50(min-max) |                         | 100(8.3-141.7) | 91.7(25.0-108.3) | 0.0002*  | <0.01* |
| Development coefficient at 6 months N (%)                          | Normal or high          | 310/391(79.3)  | 21/34(61.8)      | 0.0130*  | 0.10   |
|                                                                    | Borderline bass         | 59/391(15.1)   | 7/34(20.6)       |          |        |
|                                                                    | Very low                | 22/391(5.6)    | 6/34(17.7)       |          |        |
| Development coefficient at 12 months N (%)                         | Normal or high          | 372/395(94.2)  | 30/34(88.2)      | 0.11     |        |
|                                                                    | Borderline bass         | 13/395(3.3)    | 1/34(2.9)        |          |        |
|                                                                    | Very low                | 10/395(2.5)    | 3/34(8.8)        |          |        |

- a. Chi2 or Fisher's exact test was used for qualitative variables and Mann Whitney or Student's t-test for quantitative variables, according to the distribution of each variable in the comparison groups.
- b. Family-Wise Error Rate (FWER) for unadjusted significant values.
- c. Weight in grams, length and head circumference in cm.

Tables were based on retrospective data. There are different denominators according to data available. HC, Head Circumference. GA, NCU, Neonatal Care Unit. NICU, Neonatal Intensive Care Unit. PN, Parenteral Nutrition. INFANIB, Infanib neuromotor test. P50, percentile 50 (median).
