# Supplementary material for: Perinatal risk factors in ex-preterm and/or low birthweight Colombian young adults: a retrospective cohort study on auditory and visual impairments
Source: PubMed Central journal article supplement — Lancet Reg Health Am. 2024 Nov 5;39:100921. doi: 10.1016/j.lana.2024.100921 (PMC11570731; doi:10.1016/j.lana.2024.100921), 2024-11-05
Supplement: mmc4.pdf [file mmc4.pdf]

**Supplementary Table 2.**

**Main neonatal differences according to auditory functional diagnosis at 20 years**

| Variables                                    |                | Normal<br>audition<br>N=451 | Functional deafness<br>uni or bilateral<br>N=40 | P <sup>a</sup> | Adjusted P <sup>b</sup> |
|----------------------------------------------|----------------|-----------------------------|-------------------------------------------------|----------------|-------------------------|
| <b>Neonatal characteristics</b>              |                |                             |                                                 |                |                         |
| Birth weight <sup>c</sup> P50(min- max)      |                | 1800(800-3,806)             | 1,600(900-3,675)*                               | 0.0306*        | 0.22                    |
| GA by Ballard P50(min-max)                   |                | 34.0(26.0-41.0)             | 33.0(30.0-39.0)                                 | 0.17           |                         |
| Neonatal<br>Adaptation<br>n/N(%)             | Spontanea      | 292/352(83.0)               | 24/30(80.0)                                     | 0.24           |                         |
|                                              | Conducted      | 53/352(15.0)                | 4/30(13.3)                                      |                |                         |
|                                              | Induced        | 7/352(2.0)                  | 2/30(6.7)                                       |                |                         |
| Birth weight<br>categories<br>n/N (%)        | <=1500g        | 78/451(17.3)                | 13/40(32.5)                                     | 0.13           |                         |
|                                              | 1501 - <=1800g | 160/451(35.5)               | 13/40(32.5)                                     |                |                         |
|                                              | >=1800g        | 213/451(47.2)               | 14/40(35.0)                                     |                |                         |
| GA categories<br>n/N(%)                      | <=32 weeks     | 123/451(27.3)               | 18/40(45.0)                                     | 0.11           |                         |
|                                              | >32- <35 weeks | 122/451(27.1)               | 7/40(17.5)                                      |                |                         |
|                                              | >=35 - <37     | 109/451(24.2)               | 7/40(17.5)                                      |                |                         |
|                                              | >=37           | 97/451(21.5)                | 8/40(20.0)                                      |                |                         |
| Total days of stay in NCU P50(min-max)       |                | 14.0(1-64)                  | 16.5(0-57)                                      | 0.0007*        | <0.01*                  |
| Hospitalized in NICU n/N (%)                 |                | 44/451(12.2)                | 11/40(27.5)                                     | 0.0070*        | 0.05                    |
| Total days in NICU P50(min-max)              |                | 7(2-44)                     | 15(4-40)                                        | 0.0075*        | 0.06                    |
| Neonatal sepsis n/N(%)                       |                | 102/242(42.2)               | 17/27(63.0)                                     | 0.0390*        | 0.27                    |
| Invasive ventilation n/N(%)                  |                | 40/242(16.5)                | 9/27(33.3)                                      | 0.0320*        | 0.23                    |
| Days of invasive ventilation<br>P50(min-max) |                | 0(0-11)                     | 5(0-19)                                         | 0.0034*        | 0.03*                   |
| Required phototherapy n/N(%)                 |                | 152/451(33.7)               | 23/40(57.5)                                     | 0.0030*        | 0.02*                   |
| Received Aminoglycosides n/N(%)              |                | 126/288(43.8)               | 21/31(67.7)                                     | 0.0110*        | 0.08                    |

|                                       |         |           |         |        |
|---------------------------------------|---------|-----------|---------|--------|
| Days with Aminoglycoside P50(min-max) | 0(0-20) | 2.0(0-12) | 0.0044* | 0.03*  |
| Days with PN P50(min-max)             | 0(0-25) | 0(0-38)   | 0.0006* | <0.01* |
| Total days with oxygen P50(min-max)   | 5(0-46) | 12(0-41)  | 0.0003* | <0.01* |
